# Supplementary material for: Understanding Estimations of Magnitudes: An fMRI Investigation
Source: MDPI journal article supplement (doi:10.3390/brainsci12010104), 2022-01-12
Supplement: s1 [file s1]

**Table S1.** Descriptive Statistic of the fMRI Task, Behavioral Results.

| Category          | Knowledge |       | Quantity |       | Time    |       | Weight  |       |
|-------------------|-----------|-------|----------|-------|---------|-------|---------|-------|
|                   | Average   | S.T.D | Average  | S.T.D | Average | S.T.D | Average | S.T.D |
| Accuracy          | 82%       | 4.3%  | 62%      | 16%   | 45%     | 13%   | 52%     | 19%   |
| Absolute distance | 0.2       | .066  | 0.43     | .20   | 0.62    | .041  | 0.52    | .23   |
| RTs               | 1589      | 217   | 1806     | 149   | 1805    | 152   | 1824    | 167   |
